# Supplementary material for: Mixed Effects Modeling of Proliferation Rates in Cell-Based Models: Consequence for Pharmacogenomics and Cancer
Source: PLOS journal article supplement (doi:10.1371/journal.pgen.1002525), 2012-02-09
Supplement: S3 (10.1371/journal.pgen.1002525.s003) [file journal.pgen.1002525.s003.pdf › journal.pgen.1002525.s003.pdf]

| Term                                                                | Count | %    | PValue   | Bonferroni | Benjamini |
|---------------------------------------------------------------------|-------|------|----------|------------|-----------|
| hsa04142:Lysosome                                                   | 39    | 1.40 | 3.56E-05 | 6.77E-03   | 6.77E-03  |
| hsa00970:Aminoacyl-tRNA biosynthesis                                | 18    | 0.64 | 2.15E-04 | 4.03E-02   | 2.04E-02  |
| hsa04150:mTOR signaling pathway                                     | 20    | 0.72 | 6.41E-04 | 1.15E-01   | 4.00E-02  |
| hsa04115:p53 signaling pathway                                      | 24    | 0.86 | 6.45E-04 | 1.16E-01   | 3.04E-02  |
| hsa05120:Epithelial cell signaling in Helicobacter pylori infection | 23    | 0.82 | 1.63E-03 | 2.68E-01   | 6.06E-02  |
| hsa04910:Insulin signaling pathway                                  | 38    | 1.36 | 1.85E-03 | 2.98E-01   | 5.74E-02  |
| hsa04120:Ubiquitin mediated proteolysis                             | 38    | 1.36 | 2.46E-03 | 3.75E-01   | 6.49E-02  |
| hsa04662:B cell receptor signaling pathway                          | 24    | 0.86 | 2.85E-03 | 4.20E-01   | 6.58E-02  |
| hsa05215:Prostate cancer                                            | 27    | 0.97 | 3.32E-03 | 4.70E-01   | 6.82E-02  |
| hsa04620:Toll-like receptor signaling pathway                       | 29    | 1.04 | 5.35E-03 | 6.41E-01   | 9.73E-02  |
| hsa04010:MAPK signaling pathway                                     | 63    | 2.25 | 6.17E-03 | 6.93E-01   | 1.02E-01  |
| hsa05221:Acute myeloid leukemia                                     | 19    | 0.68 | 6.86E-03 | 7.32E-01   | 1.04E-01  |
| hsa04144:Endocytosis                                                | 46    | 1.65 | 7.07E-03 | 7.42E-01   | 9.90E-02  |
| hsa05212:Pancreatic cancer                                          | 22    | 0.79 | 8.06E-03 | 7.87E-01   | 1.04E-01  |
| hsa04722:Neurotrophin signaling pathway                             | 32    | 1.14 | 1.69E-02 | 9.62E-01   | 1.96E-01  |
| hsa04110:Cell cycle                                                 | 32    | 1.14 | 1.90E-02 | 9.74E-01   | 2.04E-01  |
| hsa04210:Apoptosis                                                  | 24    | 0.86 | 1.95E-02 | 9.77E-01   | 1.99E-01  |
